# Supplementary material
Source: PubMed Central journal article supplement (PMC2535576)
Supplement: NIHMS62687-supplement-1si20070823_09.pdf [file NIHMS62687-supplement-1si20070823_09.pdf]

Supplementary Information for

# Synthetic Ligands Discovered by In Vitro Selection

*S. Jarrett Wrenn,<sup>1</sup> Rebecca M. Weisinger,<sup>2</sup> David R. Halpin,<sup>1,#</sup> and Pehr B. Harbury<sup>1,\*</sup>*

<sup>1</sup>Department of Biochemistry and <sup>2</sup>Department of Chemistry, Stanford University,  
Stanford, California, 94305, USA

E-mail: [harbury@cmgm.stanford.edu](mailto:harbury@cmgm.stanford.edu)

<sup>#</sup>Current address: Department of Molecular and Cell Biology, University of California,  
Berkeley, California, 94720, USA

This file contains: Supplementary Figures S1 and S2 with legends  
Supplementary Table 1 with legend

Supplementary Fig. 1

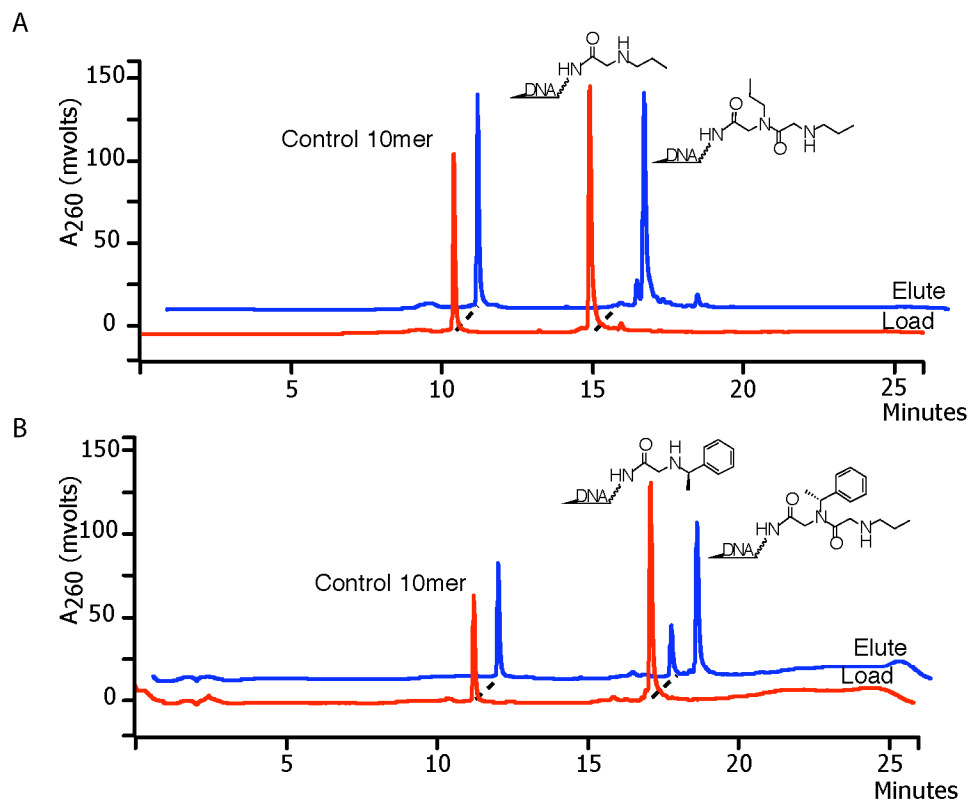

**Supplementary Fig. 1.** HPLC analysis of peptoid coupling on DNA. An unmodified 10mer and a 20mer bearing a 5' secondary amine (red trace) were loaded onto a DEAE Sepharose chemistry column, subjected to peptoid coupling (chloroacetylation and nucleophilic displacement), eluted, and analyzed by HPLC (blue trace). Shown are coupling results with **(A)** relatively unhindered (propyl) and **(B)** hindered (phenethyl) secondary amine substrates. Product masses were determined by MALDI-MS.

Supplementary Fig. 2

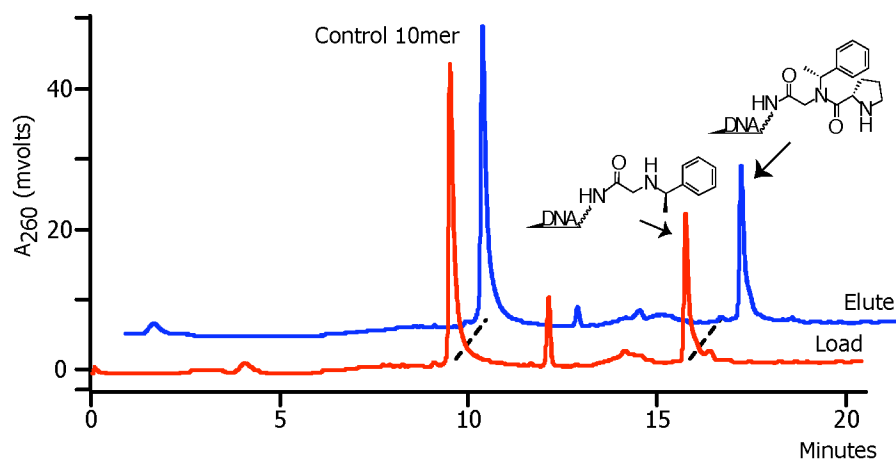

**Supplementary Fig. 2.** HPLC analysis of proline coupling on DNA. An unmodified 10mer and a 20mer bearing a hindered 5' secondary amine (red trace) were loaded onto a DEAE Sepharose chemistry column, subjected to Fmoc-proline coupling and Fmoc deprotection, eluted, and analyzed by HPLC (blue trace). Product mass was determined by MALDI-MS.

**Supplementary Table 1.** Coupling conditions and product verification for all monomers

| Amine side chain                                 | Letter | Alkylation<br>Conc. | Alkylation Product |                | Acylation Product |          |            |
|--------------------------------------------------|--------|---------------------|--------------------|----------------|-------------------|----------|------------|
|                                                  | Code   |                     | MALDI<br>-MS       | Expected       | MALDI<br>-MS      | Expected | Efficiency |
| methylamine                                      | B      | 40%                 | 6488               | 6486           | 6556              | 6563     | >95%       |
| cyclopropylamine                                 | C      | 2.5 M               | 6519               | 6512           | 6592              | 6589     | 90%        |
| isobutylamine                                    | D      | 2.5 M               | 6529               | 6528           | 6609              | 6605     | 95%        |
| ethanolamine                                     | E      | 1.5 M               | 6516               | 6519           | 6588              | 6596     | >95%       |
| trans-4-aminocyclohexanol                        | F      | 1.5 M               | 6570               | 6572           | 6656              | 6649     | 85-90%     |
| <i>S</i> (+)-1-cyclohexylethylamine              | G      | 2.5M                | 6588               | 6582           | 6657              | 6659     | 75-80%     |
| benzylamine                                      | H      | 2 M                 | 6565               | 6562           | 6643              | 6639     | 95%        |
| <i>S</i> (-)- $\alpha$ -methylbenzylamine        | I      | 3.5 M               | 6584               | 6576           | 6653              | 6653     | 75-80%     |
| 4-(2-aminoethyl)-morpholine                      | J      | 2 M                 | 6586               | 6585           | N/A               | N/A      | N/A        |
| ethylamine                                       | K      | 35%                 | 6500               | 6500           | 6574              | 6577     | >95%       |
| propylamine                                      | L      | 1.5 M               | 6518               | 6514           | 6593              | 6591     | >95%       |
| isopropylamine                                   | M      | 2.5 M               | 6516               | 6514           | 6595              | 6591     | 90-95%     |
| 3-azidopropylamine                               | N      | 40%                 | 6554               | 6555           | 6636              | 6632     | >95%       |
| 4-(aminomethyl)-pyridine                         | O      | 2 M                 | 6561               | 6563           | N/A               | N/A      | N/A        |
| agmatine                                         | P      | 1 M                 | 6595               | 6585           | 6669              | 6662     | 95%        |
| ethylenediamine                                  | Q      | 1.5 M               | 6511               | 6515           | N/A               | N/A      | N/A        |
| 1,3-diaminopropane                               | R      | 2 M                 | 6528               | 6529           | N/A               | N/A      | N/A        |
| 1,4-diaminobutane                                | S      | 2 M                 | 6543               | 6543           | N/A               | N/A      | N/A        |
| tryptamine                                       | T      | 1 M                 | 6623               | 6615           | 6697              | 6692     | 95%        |
| 3,3'-diamino- <i>N</i> -methyl-<br>dipropylamine | V      | 2 M                 | 6603               | 6600           | N/A               | N/A      | N/A        |
| tris-(2-aminoethyl)-amine                        | W      | 2 M                 | 6602               | 6601           | N/A               | N/A      | N/A        |
| piperazine                                       | X      | 1 M                 | 6549               | 6541           | N/A               | N/A      | N/A        |
| 4-azidobutylamine                                | Y      | 40%                 | 6573               | 6569           | 6650              | 6646     | >95%       |
| 3-(dimethylamino)-<br>propylamine                | Z      | 2 M                 | 6557               | 6557           | N/A               | N/A      | N/A        |
| $\beta$ -alanine <i>tert</i> -butyl ester        |        | 2 M                 | 6602               | 6600           | 6684              | 6677     | 90-95%     |
| thiophene-2-methylamine                          |        | 2.5 M               | 6576               | 6568           | 6648              | 6645     | 95%        |
| Proline                                          | A      | MALDI-MS: 6670      |                    | Expected: 6673 |                   |          |            |
| control oligo                                    |        | MALDI-MS: 6420      |                    | Expected: 6415 |                   |          |            |

<sup>a</sup>Alkylations performed in DMSO unless noted<sup>b</sup>Reaction performed in water.<sup>c</sup>Reaction performed in DMSO:water (5:1)

**Supplementary Table 1.** An unmodified 10mer and a chloroacetylated 20mer oligonucleotide were used to assess peptoid coupling for various amine side chains. For each amine, two chemistry columns were loaded with these oligonucleotides. One column was subjected to nucleophilic displacement (alkylation). The other was subjected to alkylation followed by chloroacetylation (acylation). The eluents from both columns were analyzed by HPLC. The masses of product peaks were determined by MALDI-MS. The observed and calculated masses are shown. Amine concentrations were adjusted such that quantitative alkylation was observed for each amine. Acylation efficiencies are reported to the nearest 5%. Acylation was not assessed for side chains bearing additional free amines in the side chain. The MALDI-MS results for proline coupling to a hindered amine and for a MALDI-MS control oligonucleotide are also shown (Supplementary Fig. 2).
